# Supplementary material for: Mouse SAMHD1 Has Antiretroviral Activity and Suppresses a Spontaneous Cell-Intrinsic Antiviral Response
Source: PubMed Central journal article supplement (PMC4807655; doi:10.1016/j.celrep.2013.07.037), 2013-08-22
Supplement: NIHMS766882-supplement-Table_S1.pdf [file NIHMS766882-supplement-Table_S1.pdf]

**Table S1.** Reports of type I-IFN-dependent induction of genes found up-regulated in SAMHD1-deficient mice. Related to Figure 3 and Figure S3.

| gene               | publication                                                                                                              | www.interferome.org/ | GEO accession no. GSE35825 <sup>1,*</sup> | GEO accession no. GSE36891 <sup>1,**</sup> |
|--------------------|--------------------------------------------------------------------------------------------------------------------------|----------------------|-------------------------------------------|--------------------------------------------|
| Ifi44              | Kitamura et al., 1994, Eur J Biochem., 224: 877-883; Hallen et al., 2007, J Interferon Cytokine Res., 27:675-680         | +                    | +                                         | +                                          |
| Pydc4              |                                                                                                                          |                      | +                                         | +                                          |
| Gm4955             | Ludlow et al., 2008, J Cell Biochem., 103(4):1270-82                                                                     |                      |                                           | +                                          |
| Pydc3              |                                                                                                                          |                      |                                           |                                            |
| ENSMUSG00000090158 |                                                                                                                          |                      |                                           |                                            |
| Oasl1              | Eskildsen et al., 2002, Cell Mol Life Sci., 59: 1212-1222; Eskildsen et al., 2003, Nucleic Acids Res., 31(12): 3166-3173 | +                    | +                                         | +                                          |
| Adam33             |                                                                                                                          |                      | +                                         |                                            |
| Gm2619             |                                                                                                                          |                      |                                           |                                            |
| Ifi205             | Asefa et al., 2006, FEBS Lett., 580(5):1205-14                                                                           | +                    | +                                         | +                                          |
| Ilgp1              | Uthaiyah et al., 2003, J Biol Chem., 278(31):29336-43                                                                    |                      | +                                         | +                                          |
| BC094916           |                                                                                                                          |                      | +                                         | +                                          |
| Ifit2              | Bluyssen et al., 1994, Genomics., 24(1):137-48; Wachter et al., 2007, J Virol., 81(2):860-71                             | +                    | +                                         | +                                          |
| Rsad2              | Fitzgerald, 2011, J Interferon Cytokine Res., 31(1):131-5.; Mattijssen et al., 2012, Microbes Infect., 14(5): 419-26     | +                    | +                                         | +                                          |
| Ifit3              | Wachter et al., 2007, J Virol., 81(2):860-71; Schmeisser et al., 2010, J Virol., 84(20):10671-80                         | +                    |                                           | +                                          |
| BC023105           |                                                                                                                          |                      |                                           | +                                          |
| Gm4841             |                                                                                                                          |                      |                                           | +                                          |
| Gm7592             |                                                                                                                          |                      | +                                         | +                                          |
| Ifi2712a           | Gjermandsen et al., 2000, Cytokine, 12(3):233-8; Cheriyaath et al., 2011, J Interferon Cytokine Res., 31(1)              | +                    | +                                         | +                                          |
| Ifit1              | Bluyssen et al., 1994, Genomics., 24(1):137-48; Wachter et al., 2007, J Virol., 81(2):860-71                             | +                    | +                                         | +                                          |
| Ifi2712b           | Lu et al., 2011, Cell Death Differ., 18(6):925-36                                                                        |                      | +                                         |                                            |
| Usp18              | Malakhov et al., 2002, J Biol Chem., 277(12): 9976-9981                                                                  | +                    | +                                         | +                                          |
| Ms4a6b             |                                                                                                                          |                      | +                                         | +                                          |
| Tgtp2              |                                                                                                                          | +                    |                                           | +                                          |
| Siglec1            | York et al., 2007, Arthritis Rheum., 56(3):1010-20                                                                       |                      | +                                         | +                                          |

|                    |                                                                                                                          |   |   |   |
|--------------------|--------------------------------------------------------------------------------------------------------------------------|---|---|---|
| Ms4a6c             |                                                                                                                          |   | + | + |
| Irf7               | Sato et al., 1998, FEBS Lett., 441: 106-110; Zimmerer et al., 2007, Cancer Immunol Immunother., 56:1845-1852             | + | + | + |
| C130026I21Rik      |                                                                                                                          | + | + | + |
| Oasl2              | Eskildsen et al., 2002, Cell Mol Life Sci., 59: 1212-1222; Eskildsen et al., 2003, Nucleic Acids Res., 31(12): 3166-3173 |   | + | + |
| Gm16026            |                                                                                                                          |   |   |   |
| Oas3               | Eskildsen et al., 2002, Cell Mol Life Sci., 59: 1212-1222                                                                | + | + | + |
| Isg15              | Reich et al., 1987, Proc Natl Acad Sci U S A., 84(18):6394-8; Darnell et al., 1994, Science., 264(5164):1415-21          | + | + | + |
| Mx1                | Chang et al., 1991, Arch Virol., 117(1-2):1-15; Holzinger et al., 2007, J Virol. 2007, 81(14):7776-85                    |   | + | + |
| A530032D15Rik      |                                                                                                                          |   |   | + |
| Pyhin1             | Ludlow et al., 2005, Exp Cell Res., 308: 1- 17; Schattgen et al., 2011, Immunol Rev., 243: 109-118                       |   | + | + |
| ENSMUSG00000079459 |                                                                                                                          |   |   |   |

<sup>1</sup> accessed on 11/01/2013

\* studies with IFN- $\alpha$  treatment

\*\* studies poly(IC) treatment
